# Supplementary material
Source: PubMed Central journal article supplement (PMC9630662)

**Supplementary Table 1. Comparison of Adverse Events Between Atomoxetine and Placebo Treatments**

| Symptom                          | Atomoxetine (n=39) | Placebo (n=37) |
|----------------------------------|--------------------|----------------|
| Serious Adverse Event, n (%)     |                    |                |
| Fractured right pelvis           | 1 (2.6)            | 0              |
| Acute appendicitis               | 0                  | 1 (2.7)        |
| Hypothermia/dizziness            | 1 (2.6)            | 0              |
| Severe Elevated Blood Pressure   | 0                  | 1 (2.7)        |
| Dysautonomia                     | 1 (2.6)            | 0              |
| Headache Pain                    | 0                  | 1 (2.7)        |
| Non-Serious Adverse Event, n (%) |                    |                |
| Gastrointestinal symptoms        | 12 (30.8)          | 4 (10.8)       |
| Dry mouth                        | 10 (25.6)          | 2 (5.4)        |
| Dizziness                        | 10 (25.6)          | 8 (21.6)       |
| Falls                            | 6 (15.4)           | 2 (5.4)        |
| Upper respiratory infection      | 6 (15.4)           | 9 (24.3)       |
| Headache                         | 5 (12.8)           | 2 (5.4)        |
| Constipation                     | 4 (10.3)           | 1 (2.7)        |
| Suicide                          | 3 (7.7)            | 0              |
| Tremor                           | 3 (7.7)            | 0              |
| Agitation                        | 3 (7.7)            | 1 (2.7)        |
| Loss of appetite                 | 3 (7.7)            | 1 (2.7)        |
| Fatigue                          | 3 (7.7)            | 3 (8.1)        |
| Fracture                         | 2 (5.1)            | 0              |
| Loss of Weigh                    | 2 (5.1)            | 0              |
| Anxiety                          | 2 (5.1)            | 1 (2.7)        |
| Injury                           | 2 (5.1)            | 1 (2.7)        |
| Rash                             | 2 (5.1)            | 2 (5.4)        |
| Hypokalemia                      | 1 (2.6)            | 2 (5.4)        |
| Pre-Cancerous                    | 1 (2.6)            | 2 (5.4)        |
| Back pain                        | 1 (2.6)            | 3 (8.1)        |
| Cancer                           | 1 (2.6)            | 3 (8.1)        |
| Cramp                            | 0                  | 2 (5.4)        |

\*Only the Adverse Events above 5% threshold are listed under the Non-Serious Adverse Event.

**Supplementary Table 2. Comparison of Change in Blood Pressure and Heart Rate between two Treatment Arms**

| Variable                               | Visit    | Active/Placebo<br>Median (P25 - P75) (n) | Placebo/Active<br>Median (P25 - P75) (n) | p value |
|----------------------------------------|----------|------------------------------------------|------------------------------------------|---------|
| Change in systolic BP from baseline    | 6 month  | 5.5 (-9.0, 12.0) (18)                    | 4.0 (-6.0, 15.0) (19)                    | 0.86    |
|                                        | 12 month | -4.0 (-10, 10.0) (17)                    | 3.0 (-7.0, 19.0) (19)                    | 0.25    |
| % Change in systolic BP from baseline  | 6 month  | 4.3 (-6.5, 7.6) (18)                     | 2.6 (-4.6, 12.8) (19)                    | 0.94    |
|                                        | 12 month | -3.2 (-7.6, 6.8) (17)                    | 3.0 (-5.3, 14.6) (19)                    | 0.21    |
| Change in diastolic BP from baseline   | 6 month  | 3.5 (-5.0, 6.0) (18)                     | 1.0 (-5.0, 11.0) (19)                    | 0.81    |
|                                        | 12 month | -4.0 (-9.0, 2.0) (17)                    | -3.0 (-8.0, 7.0) (19)                    | 0.22    |
| % Change in diastolic BP from baseline | 6 month  | 4.4 (-6.2, 8.3) (18)                     | 1.4 (-6.2, 16.4) (19)                    | 0.83    |
|                                        | 12 month | -4.9 (-11, 3.1) (17)                     | -4.1 (-12, 9.2) (19)                     | 0.27    |
| Change in heart rate from baseline     | 6 month  | 9.0 (6.0, 12.0) (17)                     | 1.0 (-4.0, 5.0) (19)                     | 0.0006  |
|                                        | 12 month | 4.0 (-2.0, 8.0) (17)                     | 8.0 (5.0, 12.0) (19)                     | 0.012   |
| % Change in heart rate from baseline   | 6 month  | 14.8 (10.3, 19.4) (17)                   | 2.2 (-6.5, 8.6) (19)                     | 0.0006  |
|                                        | 12 month | 6.9 (-3.4, 10.5) (17)                    | 13.8 (8.7, 24.5) (19)                    | 0.0107  |
| Change in weight from baseline         | 6 month  | -4.0 (-15, 0.0) (18)                     | -1.0 (-3.0, 1.0) (19)                    | 0.07    |
|                                        | 12 month | -1.0 (-6.0, 3.0) (17)                    | -4.0 (-7.0, -1.0) (19)                   | 0.25    |
| % Change in weight from baseline       | 6 month  | -3.0 (-7.0, 0.0) (18)                    | -0.8 (-2.0, 0.6) (19)                    | 0.07    |
|                                        | 12 month | -0.9 (-3.3, 2.3) (17)                    | -2.3 (-4.8, -0.8) (19)                   | 0.24    |

**Supplementary Figure 1. Adjusted Effect of Atomoxetine vs Placebo on Plasma Biomarkers of Target Engagement.** Catecholamine biomarkers show target engagement with norepinephrine (NE) reuptake inhibition, increasing levels of NE and dopamine (DA), both substrates for the NE transporter, and decreasing levels of catecholamine metabolites 3,4-dihydroxyphenylglycol (DHPG) and 3,4-dihydroxyphenylacetic acid (DOPAC). Values are estimated differences and corresponding 95% confidence (n=36). \*\*\*p<0.001; \*\*\*\*p<0.0001

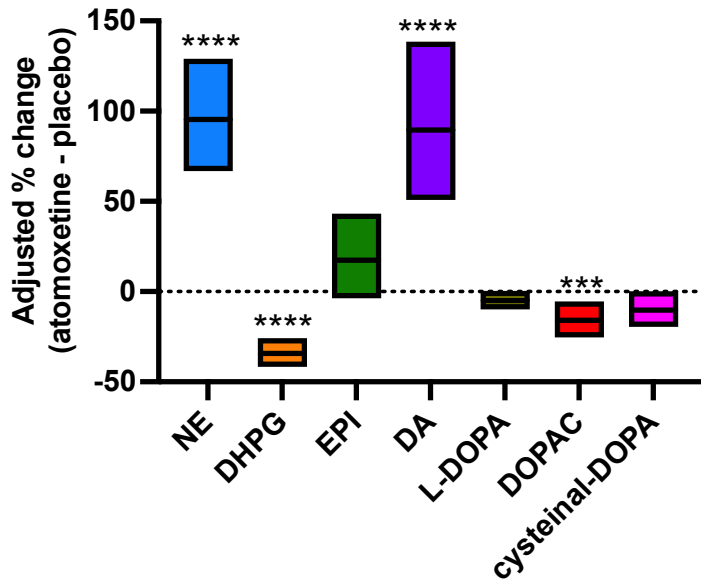

**Supplementary Figure 2. Adjusted Effect of Treatment of Atomoxetine vs Placebo on Neuropsychological Measures.** Values are estimated differences and corresponding 95% confidence interval. The asterisked results for ADAS13 and Trails B were raw p values of  $*p < 0.05$ , but were not significant after adjusting for multiple comparisons.

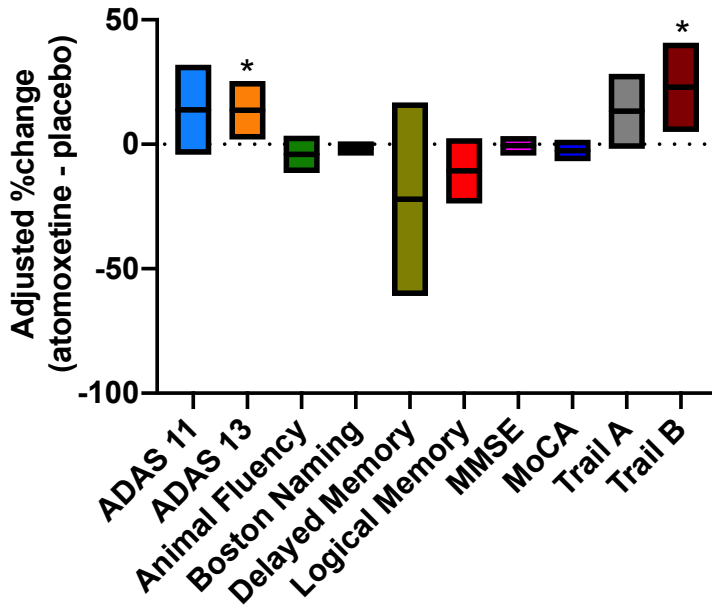

**Supplementary Figure 3. Adjusted Effect of Treatment of Atomoxetine vs Placebo on Absolute Change in CSF Biomarkers of Inflammation.** A) Immunoassays for targeted biomarkers shown. B) Proximity Extension Assays using Olink Inflammation panel. Only the significantly changed biomarkers are shown, from a panel of 92 analytes. Values are estimated differences and corresponding 95% confidence interval. \*  $p < 0.05$ ; \*\* $p < 0.01$

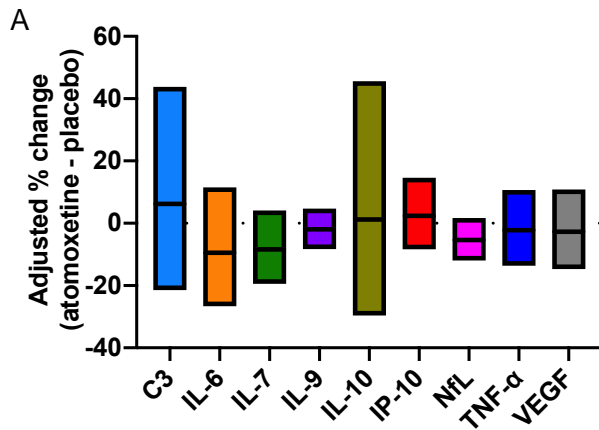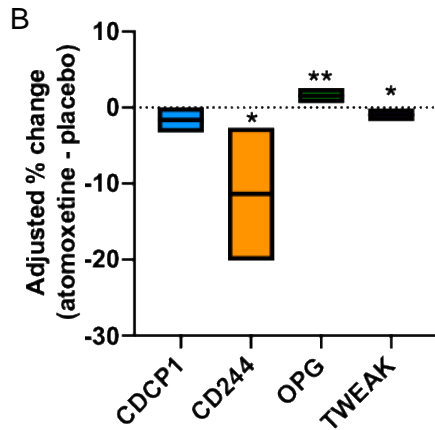

**Supplementary Figure 4. Adjusted Effect of Treatment of Atomoxetine vs Placebo on Absolute Change in Plasma Biomarkers.** A) Luminex assay results for targeted plasma biomarkers shown (performed by Dr. William Hu). B) Mesoscale multi-plexed immune-assay results for plasma analytes (performed by Dr. Malú G. Tansey). Values are estimated differences and corresponding 95% confidence interval. \* $p < 0.05$

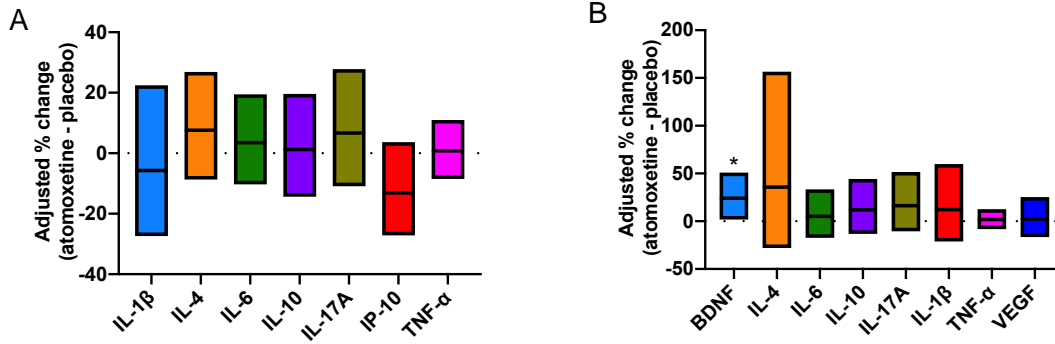

Supplement: awab452_supplementary_data.pdf [file awab452_supplementary_data.pdf]
